# Supplementary material for: Omega-3 fatty acid epoxides produced by PAF-AH2 in mast cells regulate pulmonary vascular remodeling
Source: PubMed Central journal article supplement (PMC9156667; doi:10.1038/s41467-022-30621-z), 2022-05-31
Supplement: 41467_2022_30621_MOESM1_ESM.pdf [file 41467_2022_30621_MOESM1_ESM.pdf]

**Omega-3 fatty acid epoxides produced by PAF-AH2 in  
mast cells regulate pulmonary vascular remodeling**

**SUPPLEMENTARY INFORMATION**

# Supplementary Figure 1

## a AA metabolites

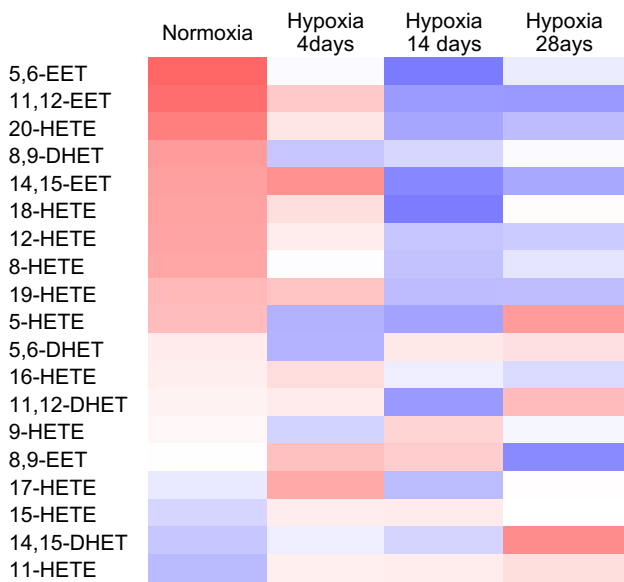

## b

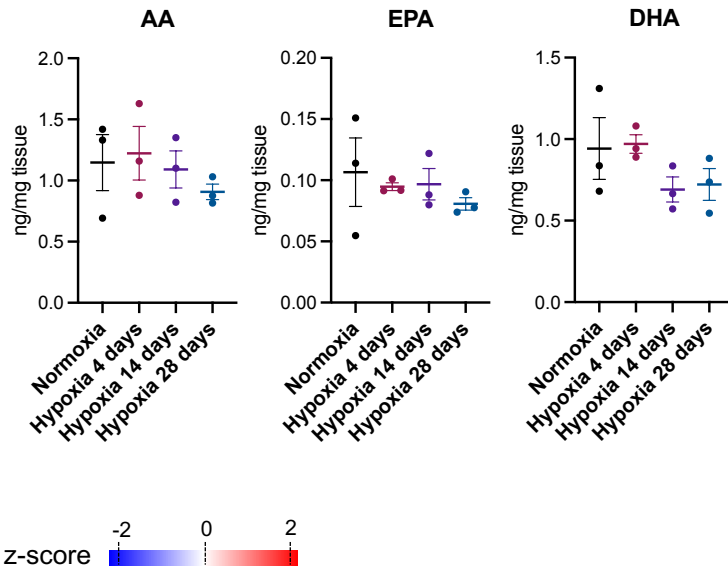

## c

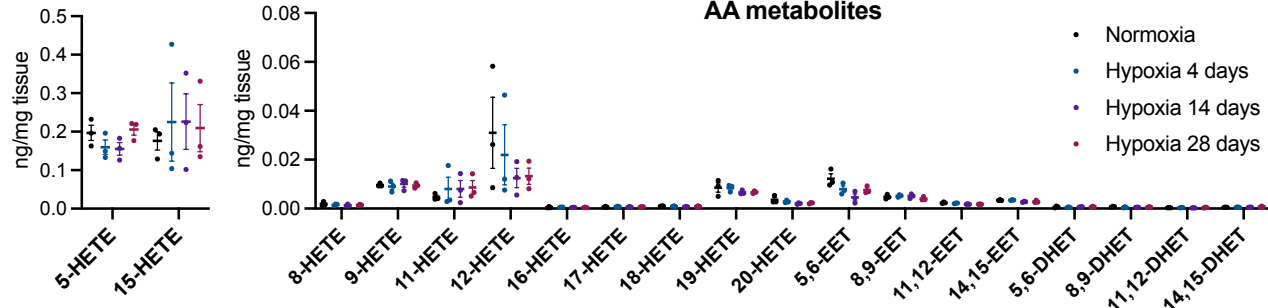

## d

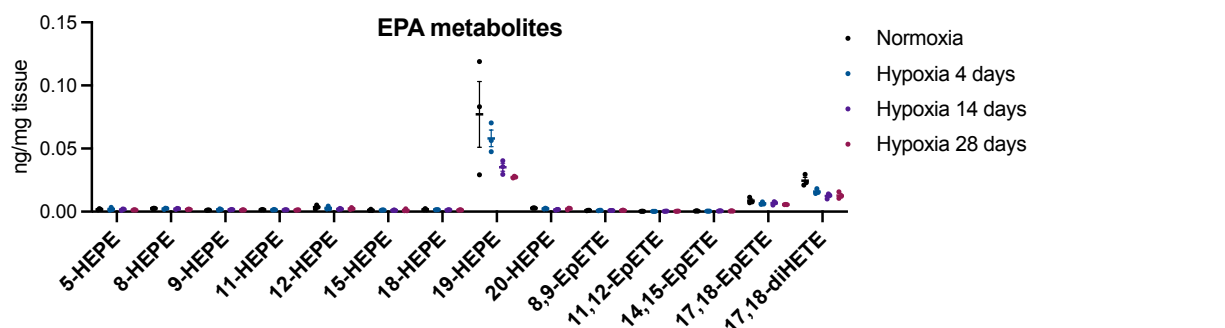

## e

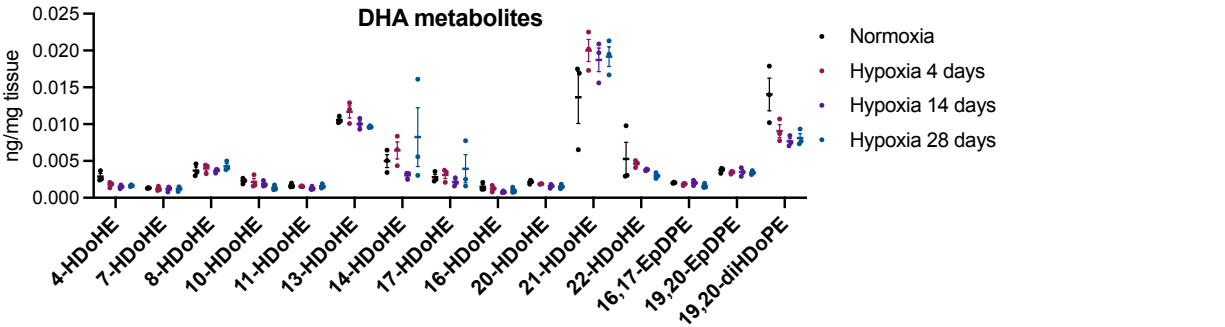

**Supplementary Figure 1.** (a) AA metabolites in LC-MS/MS based-lipidomics of the lungs of WT mice exposed to normoxia or hypoxia (10% O<sub>2</sub>) for 4, 14 and 28 days. Z-score was calculated from the average value of each group (n=3) and shown as heatmap. (b) The contents of AA, EPA and DHA assessed by LC-MS/MS based-lipidomics of the lungs of WT mice subjected to normoxia and hypoxia for 4, 14 and 28 days (n=3). (c-e) The contents of fatty acid metabolites assessed by LC-MS/MS based-lipidomics of the lungs of WT mice subjected to normoxia or hypoxia for 4, 14 and 28 days (n=3). AA metabolites (c), EPA metabolites (d), DHA metabolites (e). Data are mean ± SEM.

# Supplementary Figure 2

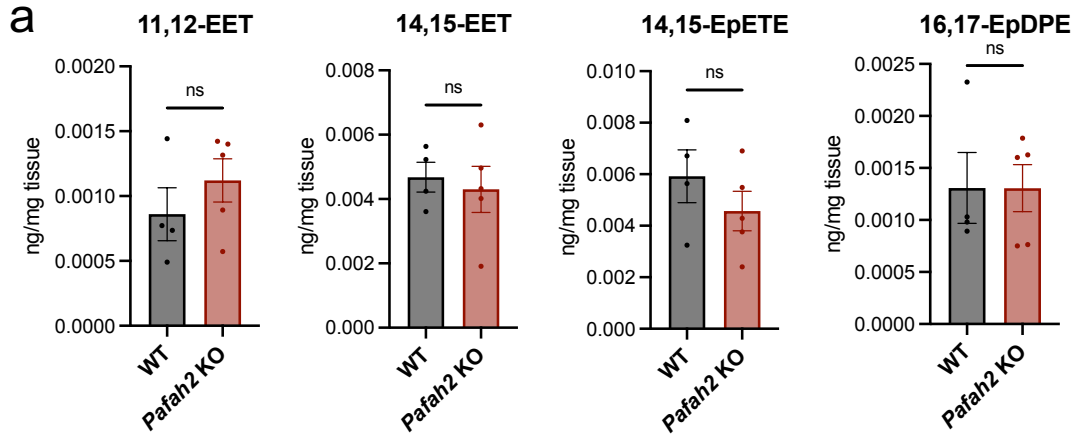

**Supplementary Figure 2. (a)** The contents of epoxy metabolites assessed by LC-MS/MS based-lipidomics of the lungs in WT mice and *Pafah2* KO mice exposed to hypoxia for 8 weeks (n=4,5). Data are mean  $\pm$  SEM; ns indicates not significant, by 2-tailed Student's T test.

# Supplementary Figure 3

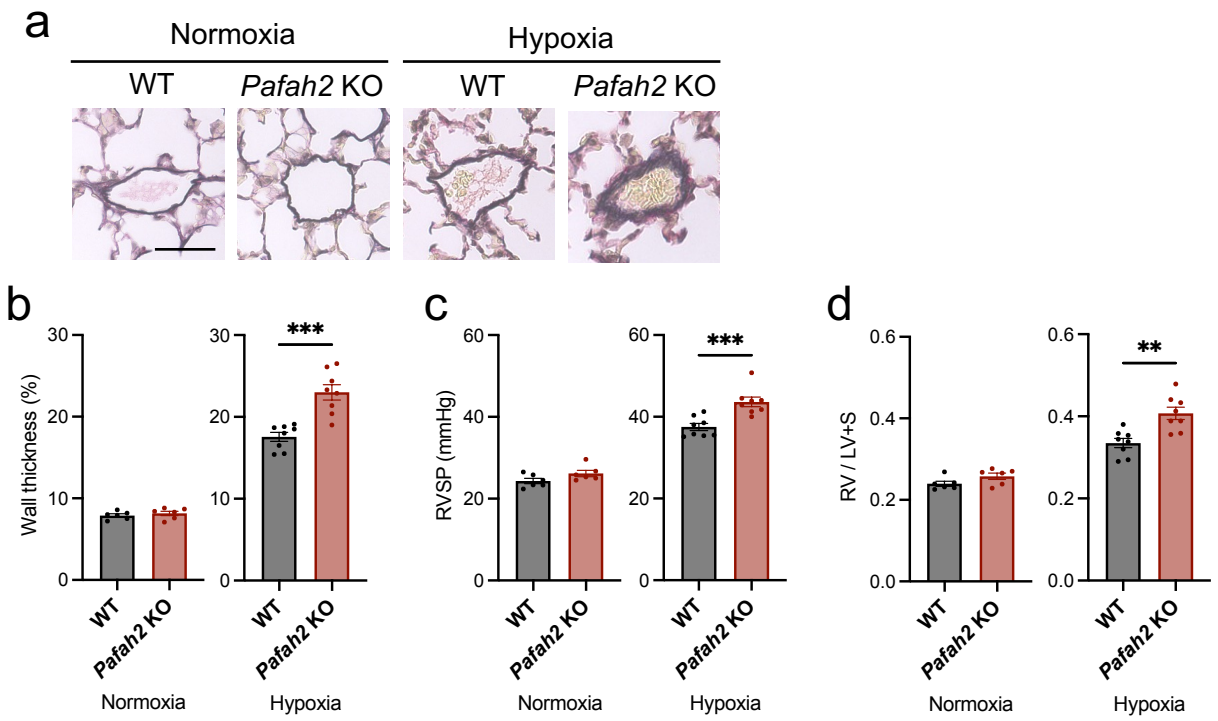

**Supplementary Figure 3.** (a) Representative image of histological sections with EVG staining (bottom) of lungs in WT and *Pafah2* KO female mice exposed to normoxia or hypoxia for 4 weeks. Scale bar, 50 $\mu$ m. (b-d) The evaluation of PH severity in WT and *Pafah2* KO female mice exposed to normoxia or hypoxia for 4 weeks (normoxia, n=6; hypoxia, n=8). Wall thickness of pulmonary arterioles (b), RVSP (c), weight ratio of RV to LV+septum (d). \*\*  $P=0.0017$ ; \*\*\*  $P=0.0002$  (panel b) and  $P=0.0008$  (panel c). Data are mean  $\pm$  SEM.  $P$  values were determined by 2-tailed Student's T test.

# Supplementary Figure 4

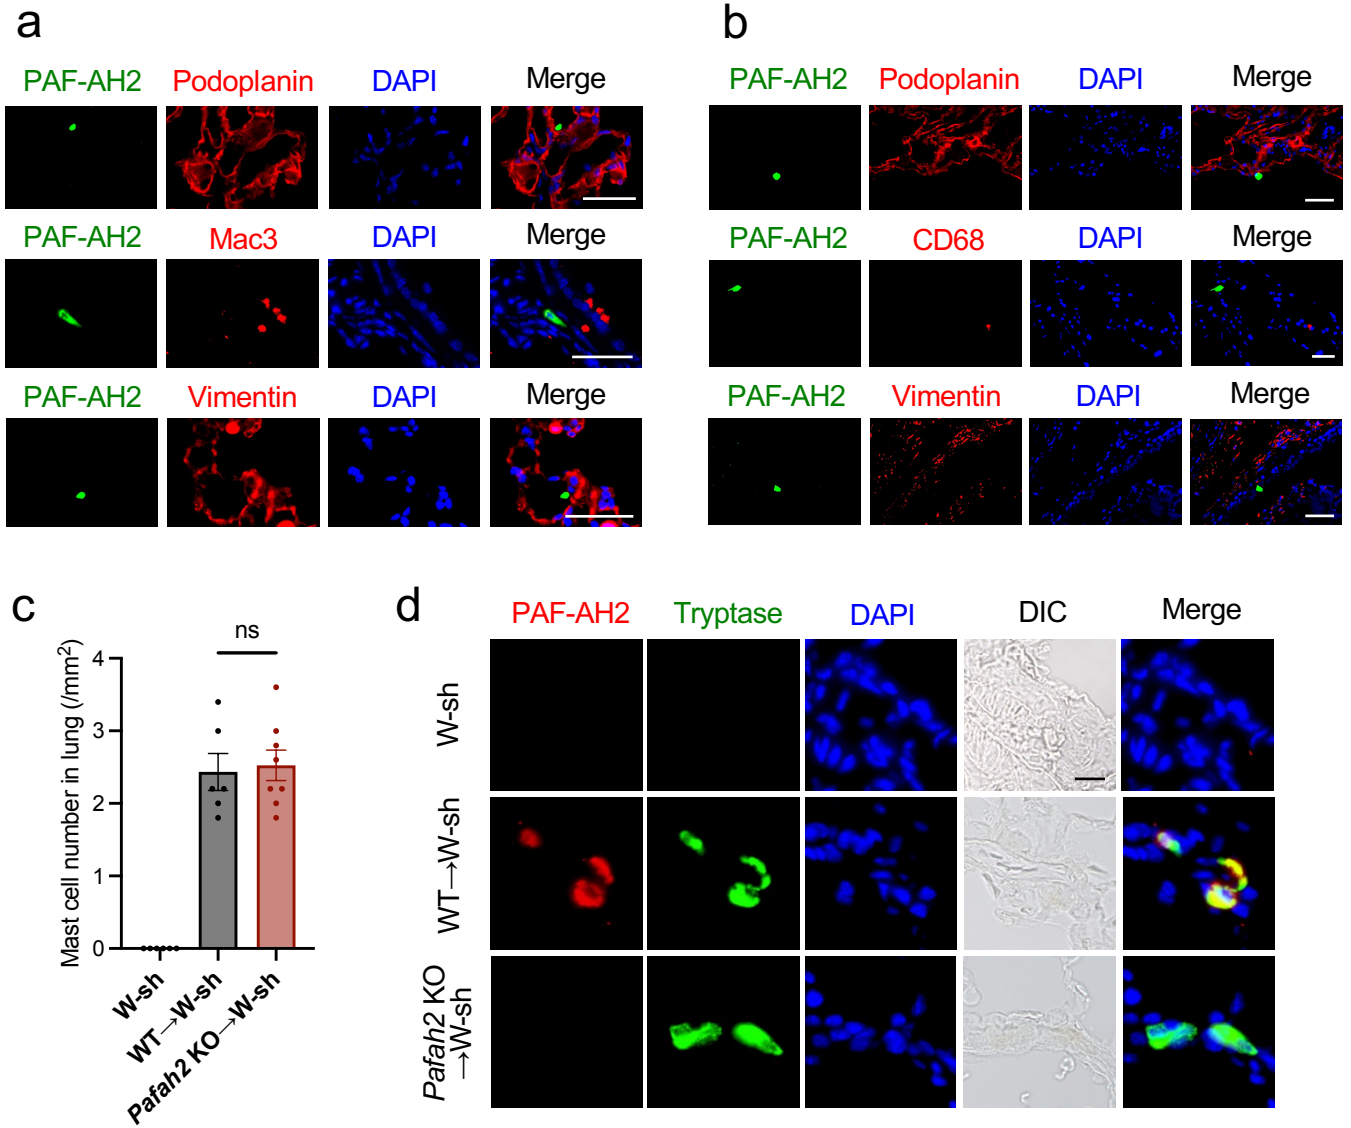

**Supplementary Figure 4.** (a) Representative image of immunohistochemistry of PAF-AH2 and Podoplanin, Mac3 or Vimentin in lung from WT mice exposed to hypoxia for 8 weeks. Nuclei were labeled with DAPI. Scale bar, 50µm. (b) Representative image of immunohistochemistry of PAF-AH2 and Podoplanin, CD68 or Vimentin in lung from PAH patient. Nuclei were labeled with DAPI. Scale bar, 50µm. (c) Number of mast cells in *Kit*<sup>W-sh/W-sh</sup> mice (W-sh) and those reconstituted with WT BMMCs (WT→W-sh) or *Pafah2* KO BMMCs (*Pafah2* KO→W-sh) evaluated by histological sections with toluidine blue staining (n=6,6,8). Data are mean ± SEM; ns indicates not significant, by one-way ANOVA with Tukey's *post hoc* test. (d) Representative image of immunohistochemistry of PAF-AH2 and Tryptase in lung from *Kit*<sup>W-sh/W-sh</sup> mice (W-sh) and those reconstituted with WT BMMCs (WT→W-sh) or *Pafah2* KO BMMCs (*Pafah2* KO→W-sh). Nuclei were labeled with DAPI. Scale bar, 10µm.

# Supplementary Figure 5

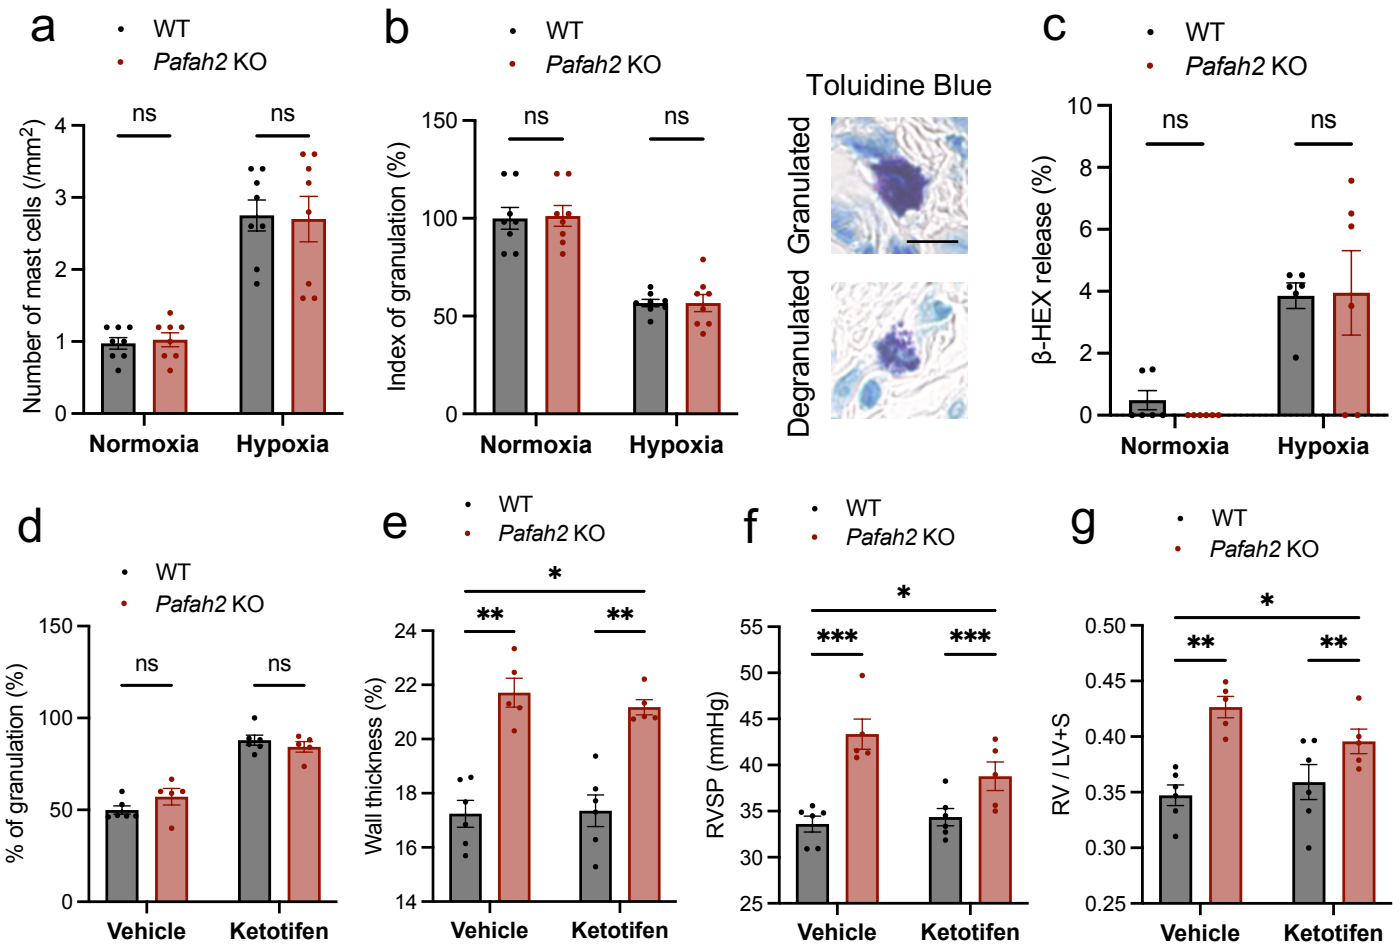

**Supplementary Figure 5.** (a) Number of mast cells in lungs of WT and *Pafah2* KO mice exposed to normoxia or hypoxia for 4 weeks evaluated by histological sections with toluidine blue staining ( $n=8$ ). (b) Index of granulation (number of granulated mast cells/number of degranulated mast cells) in lungs of WT and *Pafah2* KO mice exposed to normoxia or hypoxia for 4 weeks evaluated by histological sections with toluidine blue staining (left)( $n=8$ ). The index of granulation was expressed in percentage assuming that the average in WT mice with normoxia were 100%. Representative figures of histological sections with toluidine blue staining for granulated and degranulated mast cells (right). Scale bar, 10 $\mu\text{m}$ . (c)  $\beta$ -HEX release of WT BMMCs or *Pafah2* KO BMMCs exposed to normoxia or hypoxia (1%  $\text{O}_2$ ) for 24 hours ( $n=6$ ). Data are representative of 2 independent experimental replicates. (d) Ratio of mast cell granulation (number of granulated mast cells/total number of mast cells  $\times 100\%$ ) in lungs of hypoxia-exposed WT mice and *Pafah2* KO mice when administered vehicle or Ketotifen (1 mg/kg/day) evaluated by histological lung sections with toluidine blue staining ( $n=6,5,6,5$ ). (e-g) The evaluation of PH severity in hypoxia-exposed WT mice and *Pafah2* KO mice when administered vehicle or Ketotifen ( $n=6,5,6,5$ ). Wall thickness of pulmonary arterioles (e), RVSP (f), weight ratio of RV to LV+septum (g). \*  $P=0.0175$  (panel e),  $P=0.0467$  (panel f), and  $P=0.0500$  (panel g); \*\*  $P=0.0051$  (Vehicle and Ketotifen in panel e),  $P=0.0011$  (Vehicle in panel g), and  $P=0.0085$  (Ketotifen in panel g); \*\*\*  $P=0.0002$  (Vehicle and Ketotifen in panel f). Data are mean  $\pm$  SEM. ns indicates not significant.  $P$  values were determined by two-way ANOVA with Tukey's *post hoc* test.

# Supplementary Figure 6

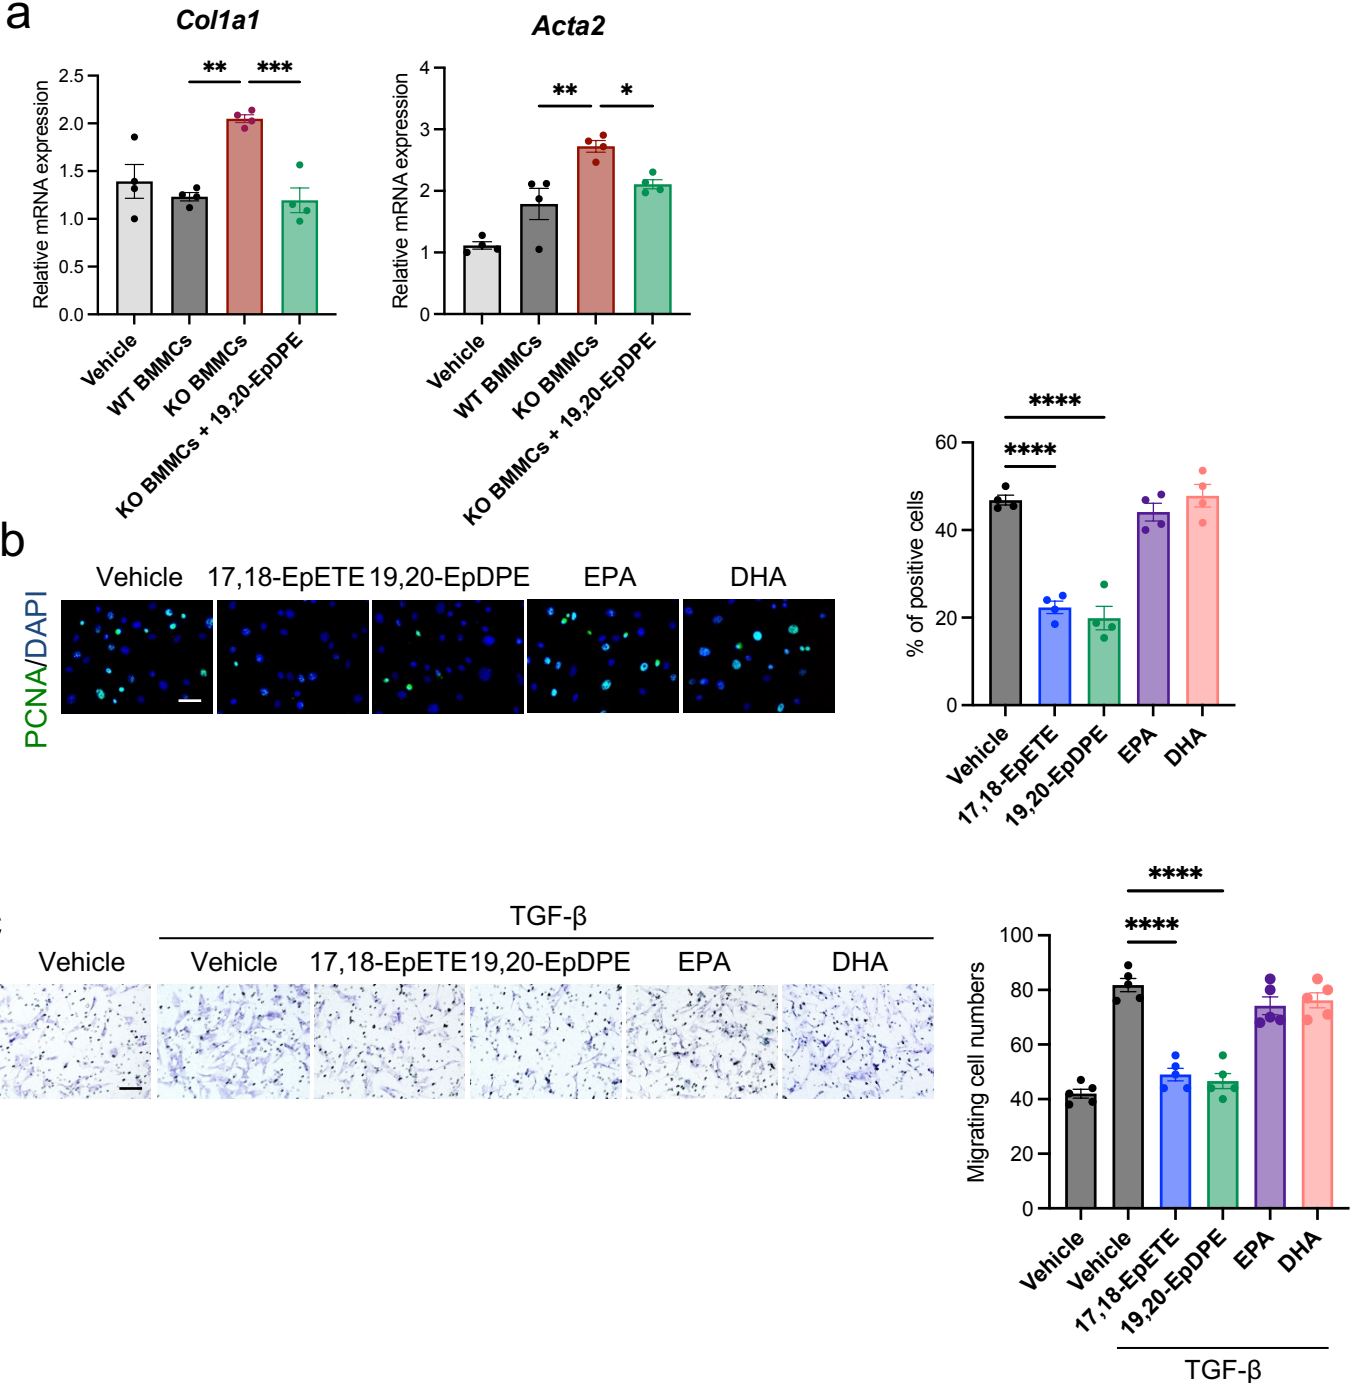

**Supplementary Figure 6.** (a) Relative mRNA levels of *Col1a1* and *Acta2* in lung fibroblasts stimulated by lipid extracts when treated with or without  $\omega$ -3 epoxides (1 $\mu$ M) for 6 hours (n=4). Expression levels were normalized to those of 18S ribosomal RNA and then to those in the fibroblasts treated with vehicle. Data are representative of 2 independent experimental replicates. \*  $P=0.0436$ ; \*\*  $P=0.0013$  (*Col1a1*) and  $P=0.0028$  (*Acta2*); \*\*\*  $P=0.0009$ . (b) Immunocytochemistry for PCNA in lung fibroblasts when treated with vehicle, 17,18-EpETE (1 $\mu$ M), 19,20-EpDPE (1 $\mu$ M), EPA (1 $\mu$ M), or DHA (1 $\mu$ M) for 24 hours (left). Scale bar, 50 $\mu$ m. The percentage of PCNA-positive lung fibroblasts in total DAPI-positive cells (right) (n=4). Data are representative of 2 independent experimental replicates. \*\*\*\*  $P<0.0001$ . (c) Boyden chamber-based cell migration assay of lung fibroblasts stimulated by TGF- $\beta$  (2.5 ng/ml) when treated with vehicle, 17,18-EpETE (1 $\mu$ M), 19,20-EpDPE (1 $\mu$ M), EPA (1 $\mu$ M), or DHA (1 $\mu$ M) for 24 hours. Toluidine blue staining images (left). Scale bar, 100 $\mu$ m. Migrating cell numbers of lung fibroblasts (n=5) (right). Data are representative of 2 independent experimental replicates. \*\*\*\*  $P<0.0001$ . Data are mean  $\pm$  SEM.  $P$  values were determined by one-way ANOVA with Tukey's *post hoc* test.

# Supplementary Figure 7

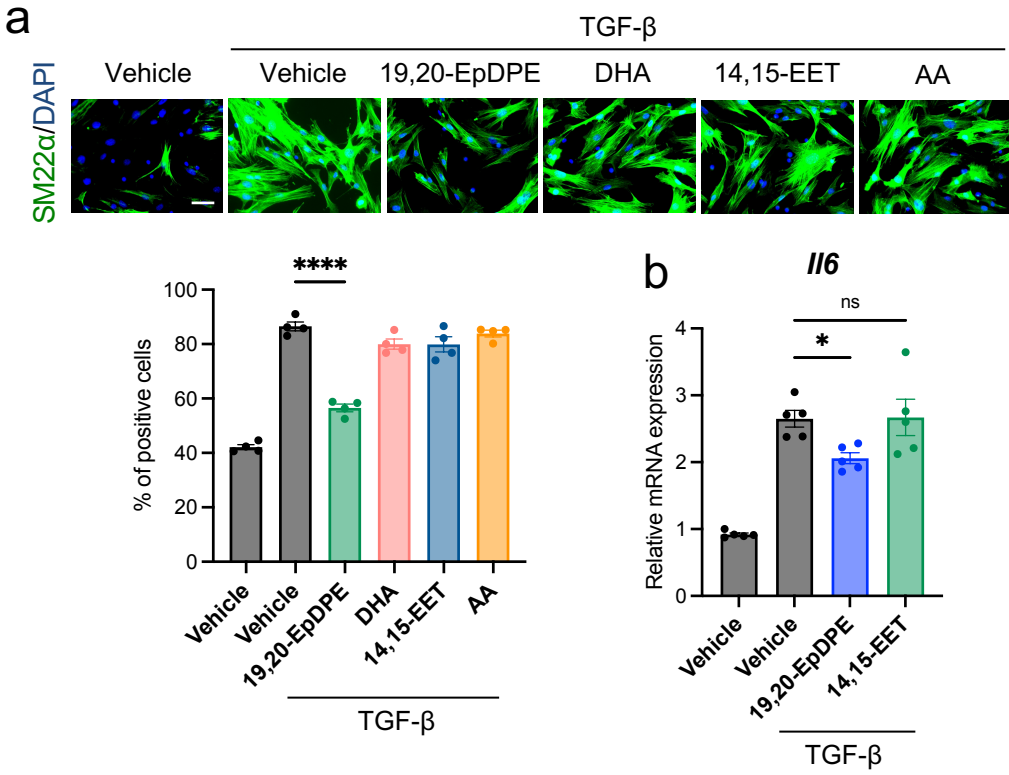

**Supplementary Figure 7. (a)** Immunostaining of SM22 $\alpha$  in lung fibroblasts stimulated with TGF- $\beta$  (2.5 ng/ml) when treated with vehicle, 19,20-EpDPE (1 $\mu$ M), DHA (1 $\mu$ M), 14,15-EET (1 $\mu$ M) or AA (1 $\mu$ M) for 24 hours (left). Scale bar, 50 $\mu$ m. Ratio of SM22 $\alpha$ -positive cells to total lung fibroblasts (right) (n=4). \*\*\*\*  $P < 0.0001$ . **(b)** Relative expression levels of *I16* mRNA in lung fibroblasts stimulated with TGF- $\beta$  (2.5 ng/ml) when treated with vehicle, 19,20-EpDPE (1 $\mu$ M) or 14,15-EET (1 $\mu$ M) for 6 hours when (n=5). Expression levels were normalized to those of 18S ribosomal RNA and then to those in the unstimulated control fibroblasts. Data are representative of 2 independent experimental replicates. \*  $P = 0.0156$ . Data are mean  $\pm$  SEM. ns indicates not significant.  $P$  values were determined by one-way ANOVA with Dunnett's *post hoc* test.



# Supplementary Figure 8

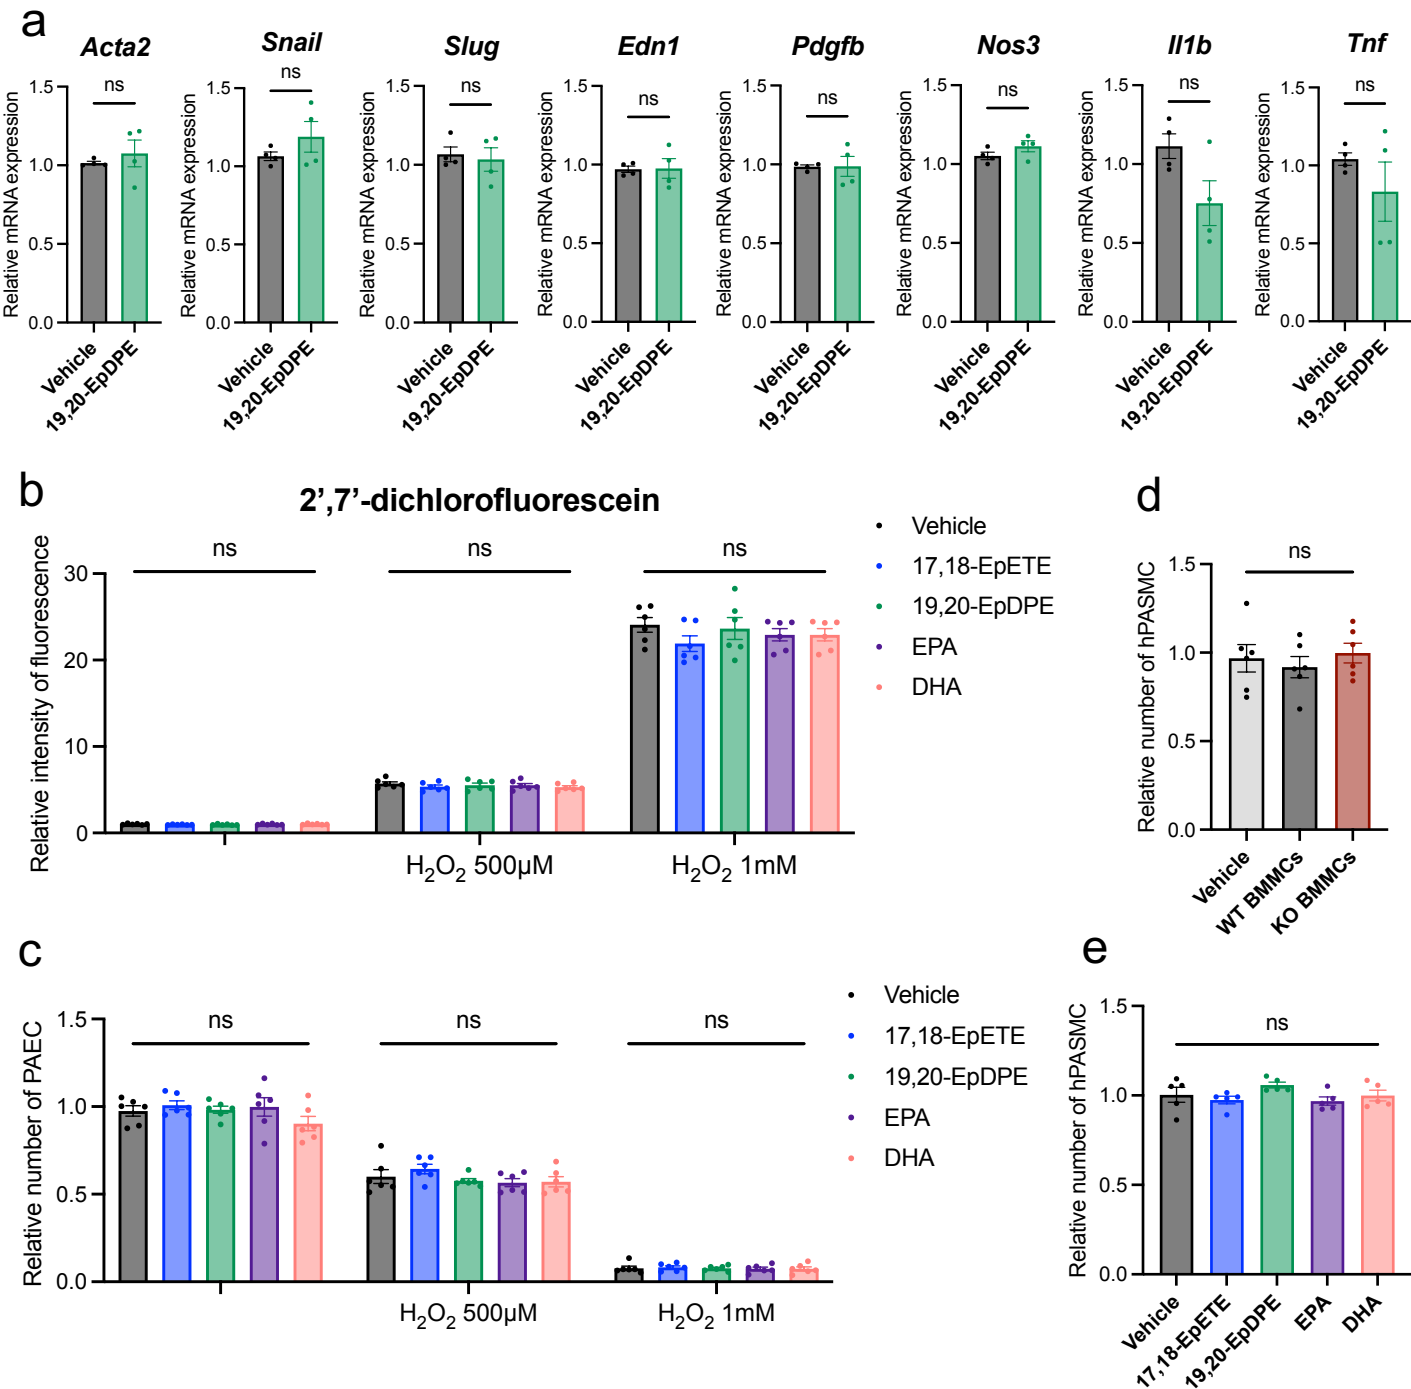

**Supplementary Figure 8.** (a) Relative mRNA levels of *Acta2*, *Snail*, *Slug*, *Edn1*, *Pdgfb*, *Nos3*, *Il1b*, and *Tnf* in human pulmonary artery endothelial cells stimulated by TGF- $\beta$  (2.5ng/ml) when treated with vehicle or 19,20-EpDPE (1 $\mu$ M) for 6 hours (n=4). Expression levels were normalized to those of 18S ribosomal RNA and then to those in the endothelial cells treated with vehicle. Data are representative of 2 independent experimental replicates. (b) Relative levels of 2',7'-dichlorofluorescein for the detection of intracellular reactive oxygen species in human pulmonary artery endothelial cells stimulated with or without H<sub>2</sub>O<sub>2</sub> (500 $\mu$ M or 1mM) when treated with vehicle, 17,18-EpETE (1 $\mu$ M), 19,20-EpDPE (1 $\mu$ M), EPA (1 $\mu$ M), or DHA (1 $\mu$ M) for an hour (n=6). Data are representative of 3 independent experimental replicates. (c) Relative number of pulmonary artery endothelial cells (PAEC) stimulated with or without H<sub>2</sub>O<sub>2</sub> (500 $\mu$ M or 1mM) when treated with vehicle, 17,18-EpETE (1 $\mu$ M), 19,20-EpDPE (1 $\mu$ M), EPA (1 $\mu$ M), or DHA (1 $\mu$ M) for 2 hours (n=6). Data are representative of 3 independent experimental replicates. (d) Relative number of human pulmonary artery smooth muscle cells (hPASMC) stimulated by lipid extracts from cultured medium of BMMCs for 48 hours (n=4). Data are representative of 2 independent experimental replicates. (e) Relative number of human pulmonary artery smooth muscle cells (hPASMC) when treated with vehicle, 17,18-EpETE (1 $\mu$ M), 19,20-EpDPE (1 $\mu$ M), EPA (1 $\mu$ M), or DHA (1 $\mu$ M) for 48 hours (n=5). Data are representative of 3 independent experimental replicates. Data are mean  $\pm$  SEM; ns indicates not significant, by 2-tailed Student's T test (a), two-way ANOVA with Dunnett's *post hoc* test (b,c), or one-way ANOVA with Dunnett's *post hoc* test (d,e).

# Supplementary Figure 9

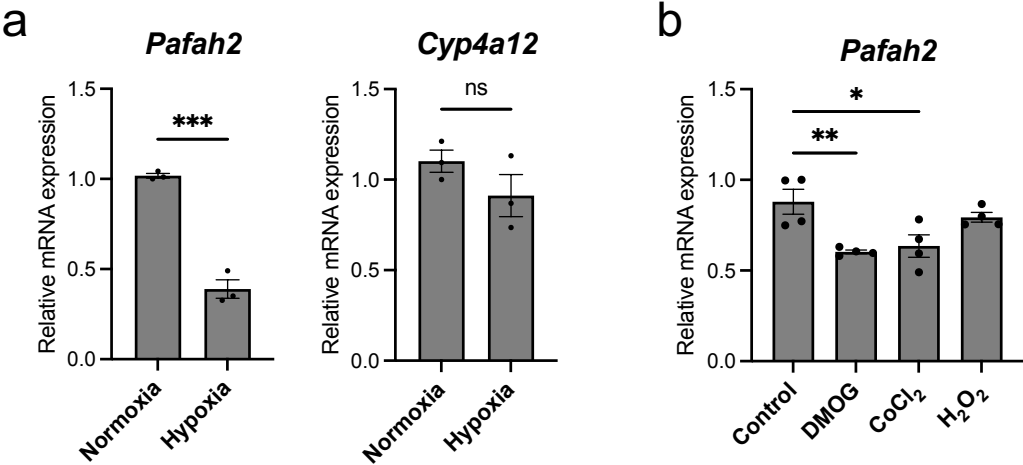

**Supplementary Figure 9. (a)** Relative mRNA levels of *Pafah2* and *Cyp4a12* in BMMCs exposed to normoxia or hypoxia (1% O<sub>2</sub>) for 24 hours (n=3). Expression levels were normalized to those of 18S ribosomal RNA and then to those in BMMCs under normoxic condition. Data are representative of 3 independent experimental replicates. \*\*\*  $P=0.0003$ ; ns indicates not significant. **(b)** Relative mRNA levels of *Pafah2* in BMMCs stimulated by DMOG (1mM), CoCl<sub>2</sub> (500 $\mu$ M), or H<sub>2</sub>O<sub>2</sub> (500 $\mu$ M) for 6 hours (n=4). Expression levels were normalized to those of 18S ribosomal RNA and then to those in control BMMCs. Data are representative of 3 independent experimental replicates. \*  $P=0.0100$ ; \*\*  $P=0.0044$ . Data are mean  $\pm$  SEM.  $P$  values were determined by 2-tailed Student's T test (a) or one-way ANOVA with Dunnett's *post hoc* test (b).

# Supplementary Figure 10

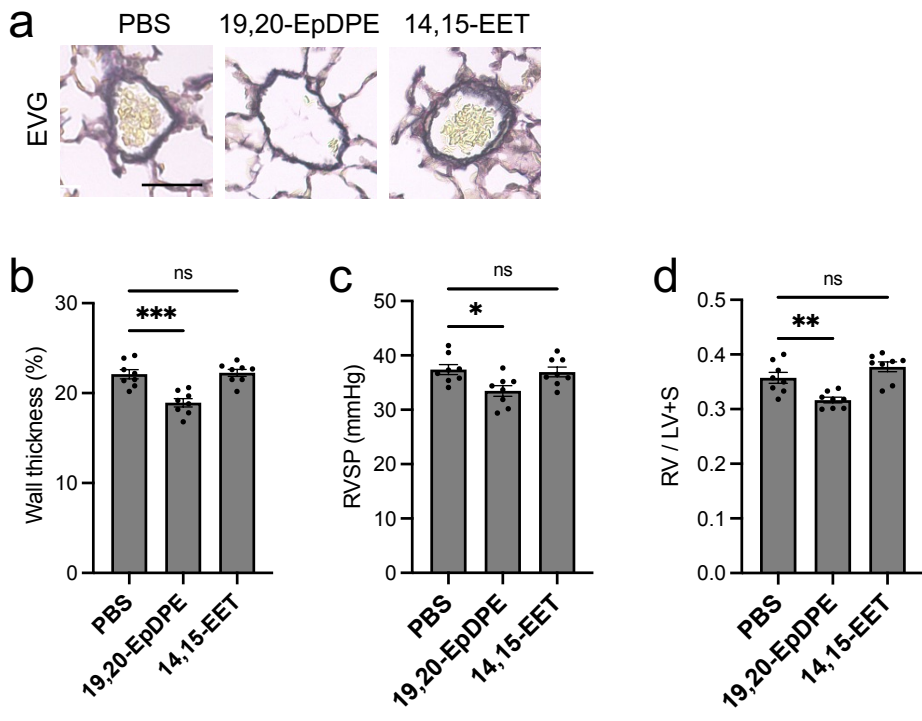

**Supplementary Figure 10.** (a) EVG staining in lungs of WT mice exposed to hypoxia for 4 weeks when administered PBS, 19,20-EpDPE (0.05 mg/kg/day), or 14,15-EET (0.05 mg/kg/day) i.p. every day. These administrations were started 2 weeks after hypoxic exposure. Scale bar, 50µm. (b-d) The evaluation of PH severity in WT mice exposed to hypoxia for 4 weeks when administered PBS, 19,20-EpDPE (0.05 mg/kg/day), or 14,15-EET (0.05 mg/kg/day) (n=8). Wall thickness of pulmonary arterioles (b), RVSP (c), weight ratio of RV to LV+septum (d). \*  $P=0.0139$ ; \*\*  $P=0.0043$ ; \*\*\*  $P=0.0001$ . Data are mean  $\pm$  SEM. ns indicates not significant.  $P$  values were determined by one-way ANOVA with Dunnett's *post hoc* test.

# Supplementary Figure 11

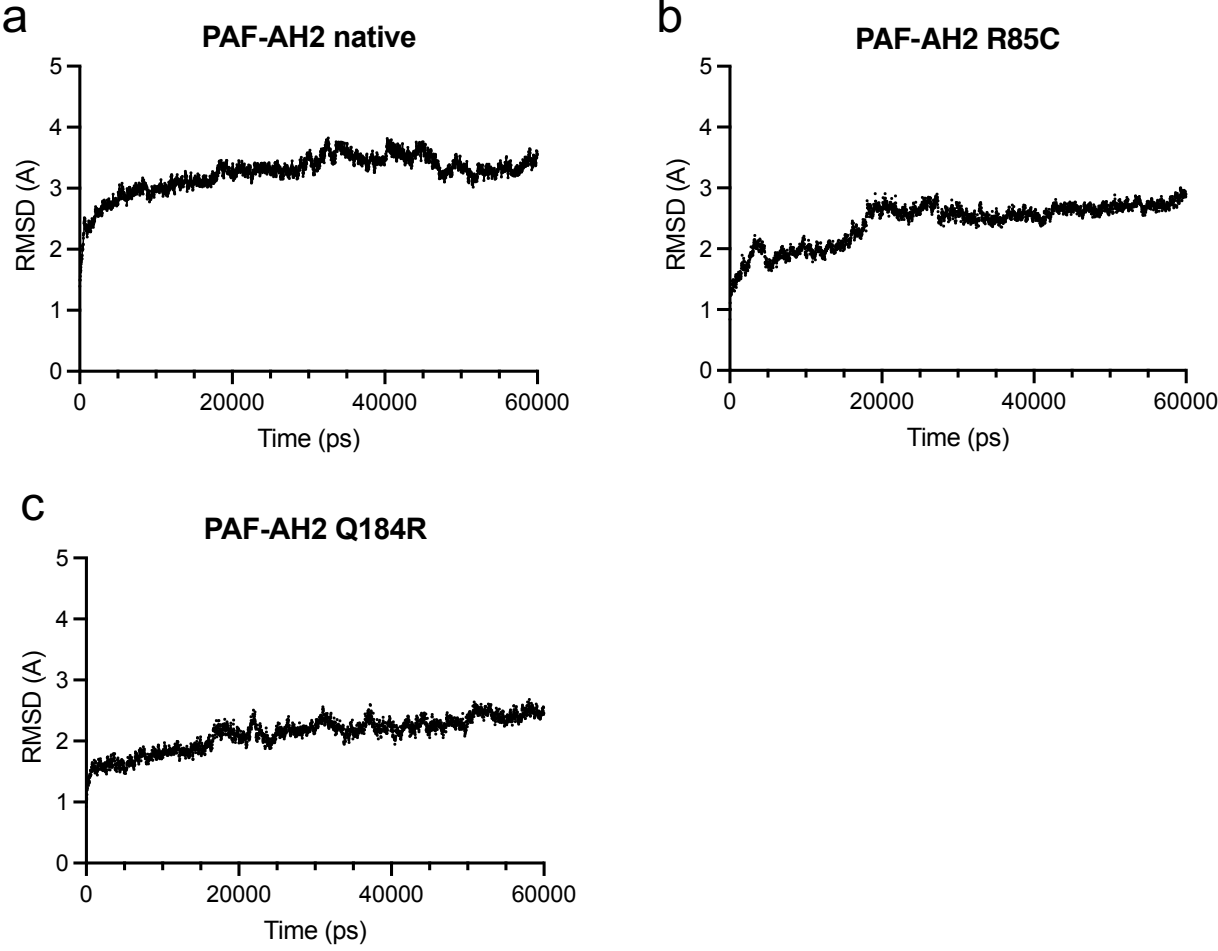

**Supplementary Figure 11.** (a-c) Root mean square deviation (RMSD) plot showing stabilization of the model structure in 60 nano-seconds. PAF-AH2 native (a), PAF-AH2 R85C variant (b), and PAF-AH2 Q184R variant (c).

## SUPPLEMENTARY TABLES

**Supplementary Table 1. Number of patients underwent whole-exome sequencing in each clinical classification of PH**

| Clinical classification |                                                  | n   |
|-------------------------|--------------------------------------------------|-----|
| 1                       | PAH                                              |     |
| 1.1                     | Idiopathic PAH                                   | 90  |
| 1.2                     | Heritable PAH                                    |     |
| 1.2.1                   | BMP2                                             | 51  |
| 1.2.2                   | Other mutations                                  | 10  |
| 1.3                     | Drugs and toxin induced                          | 6   |
| 1.4                     | Associated with:                                 |     |
| 1.4.1                   | Connective tissue disease                        | 54  |
| 1.4.2                   | HIV infection                                    | 1   |
| 1.4.4                   | Congenital heart diseases                        | 30  |
| 1'                      | PVOD and/or pulmonary capillary hemangiomatosis  | 11  |
| 4                       | CTEPH and other pulmonary artery obstructions    | 5   |
| 5                       | PH with unclear and/or multifactorial mechanisms | 4   |
| Total                   |                                                  | 262 |

Patients were classified into clinical classification of PH according to ESC/ERS guideline 2015<sup>1</sup>.

PAH, pulmonary arterial hypertension; BMP2, bone morphogenetic protein receptor type II; HIV, human immunodeficiency virus; PVOD, pulmonary veno-occlusive disease; CTEPH, chronic thromboembolic pulmonary hypertension; PH, pulmonary hypertension.

**Supplementary Table 2. Characteristics of patients with *Pafah2* variants and their clinical data.**

| Case                                 | 1                                       | 2                                             | 3                         |
|--------------------------------------|-----------------------------------------|-----------------------------------------------|---------------------------|
| Diagnosis                            | idiopathic PAH                          | idiopathic PAH                                | borderline PH             |
| Comorbidities                        | -                                       | -                                             | MCTD                      |
| Gender                               | female                                  | female                                        | female                    |
| Clinical data at diagnosis           |                                         |                                               |                           |
| Age at diagnosis, years old          | 16                                      | 59                                            | 39                        |
| WHO-FC                               | 2                                       | 2                                             | 2                         |
| Height, cm                           | 147                                     | 149                                           | 158                       |
| Body weight, kg                      | 40                                      | 56                                            | 58                        |
| Mean RAP, mmHg                       | 5                                       | 2                                             | 6                         |
| Mean PAP, mmHg                       | 45                                      | 41                                            | 21                        |
| Cardiac output, L/min                | 4.1                                     | 6.1                                           | 5.0                       |
| PVR, Wood units                      | 8.5                                     | 6.4                                           | 1.6                       |
| PAWP, mmHg                           | 10                                      | 2                                             | 13                        |
| BNP, pg/mL                           | 21                                      | 106                                           | 45                        |
| 6MWD, m                              | 563                                     | 245                                           | 325                       |
| Clinical data at follow-up           |                                         |                                               |                           |
| Medication                           | Tadalafil<br>Macitentan<br>Epoprostenol | Tadalafil<br>Macitentan                       | Sildenafil<br>Ambrisentan |
| Mean PAP, mmHg                       | 41                                      | 34                                            | 16                        |
| PVR, Wood units                      | 7.0                                     | 6.0                                           | 1.0                       |
| <i>Pafah2</i> variant                | c.253C>T<br>(p.Arg85Cys)                | c.551A>G<br>(p.Gln184Arg)                     | c.253C>T<br>(p.Arg85Cys)  |
| CADD PHRED* <sup>1</sup>             | 32.0                                    | 32.0                                          | 32.0                      |
| SIFT* <sup>1</sup>                   | deleterious                             | deleterious                                   | deleterious               |
| Polyphen* <sup>1</sup>               | probably damaging                       | probably damaging                             | probably damaging         |
| Total AF* <sup>2</sup>               | 0.0022                                  | 0.000863                                      | 0.0022                    |
| Japanese AF* <sup>3</sup>            | 0.0045                                  | 0                                             | 0.0045                    |
| Mutations in known PAH-related genes | -                                       | <i>ATP13A3</i> ,<br>c.736A>G<br>(p.Ile246Val) | -                         |
| CADD PHRED* <sup>1</sup>             | -                                       | 23.2                                          | -                         |
| SIFT* <sup>1</sup>                   | -                                       | tolerated                                     | -                         |
| Polyphen* <sup>1</sup>               | -                                       | possibly damaging                             | -                         |
| Total AF* <sup>2</sup>               | -                                       | 0.0001125                                     | -                         |
| Japanese AF* <sup>3</sup>            | -                                       | 0.0001                                        | -                         |

PAH, pulmonary arterial hypertension; PH, pulmonary hypertension; MCTD, mixed connective tissue disease; WHO-FC, World Health Organization function class; RAP, right atrial pressure; PAP, pulmonary arterial pressure; PVR, pulmonary vascular resistance; PAWP, pulmonary arterial wedge pressure; BNP, B-type natriuretic peptide; 6MWD, 6-minute walk distance; AF, allele frequency.

\*1; Pathogenicity scores were obtained from CADD web site (<https://cadd.gs.washington.edu/>).

\*2; Allele frequencies were obtained from ExAc browser (Beta) (<http://exac.broadinstitute.org/>).

\*3; Allele frequencies for Japanese general population were obtained from ToMMo 3.5KJSNV ver.1/2 data.

**Supplementary Table 3. List of primer sequences used for real-time PCR**

| Mouse          | Forward                 | Reverse                  |
|----------------|-------------------------|--------------------------|
| <i>Nppa</i>    | ACCTGCACCACCTGGAGGAG    | CCTTGGCTGTTATCTTCGGTACCG |
| <i>Col1a1</i>  | CCTCAAGGGCTCCAACGAG     | TCAATCACTGTCTTGCCCA      |
| <i>Acta2</i>   | CGAAACCACCTATAACAGCATCA | GCGTTCTGGAGGGGCAAT       |
| <i>Il6</i>     | GTCCTTCAGAGAGATACAGAACT | AGCTTATCTGTTAGGAGAGCATTG |
| <i>Pafah2</i>  | GAAAGAGTGTGTGCGAGTGC    | AGCAAGAACAGCCGTAGCTC     |
| <i>Cyp4a12</i> | GCCTTATACGGAAATCATGGC   | TGGAATCCTGGCCAACAATC     |
| <i>18S</i>     | CTTAGAGGGACAAGTGCG      | ACGCTGAGCCAGTCAGTGTA     |
| Human          | Forward                 | Reverse                  |
| <i>Acta2</i>   | CTATGAGGGCTATGCCTTGCC   | GCTCAGCCAGTAGTAACGAAGGA  |
| <i>Snail</i>   | TCGGAAGCCTAACTACACAGCGA | AGATGAGCATTGGCAGCGAG     |
| <i>Slug</i>    | CGAACTGGACACACATACAGTG  | CTGAGGATCTCTGGTTGTGGT    |
| <i>Edn1</i>    | AGAGTGTGTCTACTTCTGCCA   | CTTCCAAGTCCATACGGAACAA   |
| <i>Pdgfb</i>   | CTCGATCCGCTCCTTTGATGA   | CGTTGGTGCGGTCTATGAG      |
| <i>Nos3</i>    | TGATGGCGAAGCGAGTGAAG    | ACTCATCCATACACAGGACCC    |
| <i>Il1b</i>    | TTCGACACATGGGATAACGAGG  | TTTTTGCTGTGAGTCCCGGAG    |
| <i>Tnf</i>     | TCAGATCATCTTCTCGAACCCC  | ATCTCTCAGCTCCACGCCAT     |
| <i>18S</i>     | CTACCACATCCAAGGAAGCA    | TTTTTCGTCACCTCCCCG       |



## SUPPLEMENTARY REFERENCES

1. Galie N, *et al.* 2015 ESC/ERS Guidelines for the diagnosis and treatment of pulmonary hypertension: The Joint Task Force for the Diagnosis and Treatment of Pulmonary Hypertension of the European Society of Cardiology (ESC) and the European Respiratory Society (ERS): Endorsed by: Association for European Paediatric and Congenital Cardiology (AEPC), International Society for Heart and Lung Transplantation (ISHLT). *European heart journal* **37**, 67-119 (2016).
